# Supplementary material for: A Life Course Perspective on Growing Older With Cerebral Palsy
Source: PubMed Central journal article supplement — Qual Health Res. 2020 Nov 19;31(4):654–64. doi: 10.1177/1049732320971247 (PMC7883004; doi:10.1177/1049732320971247), 2020-11-19
Supplement: sj-pdf-1-qhr-10.1177_1049732320971247.pdf [file sj-pdf-1-qhr-10.1177_1049732320971247.pdf]

| Characteristic           | Category               | <i>n</i> | %    |
|--------------------------|------------------------|----------|------|
| Age, years, M (range)    | 31.42 (18-65)          |          |      |
| Gender                   | Female                 | 24       | 63.2 |
|                          | Male                   | 14       | 36.8 |
| GMFCS                    | I                      | 12       | 31.6 |
|                          | II                     | 18       | 47.3 |
|                          | III                    | 9        | 21.1 |
| Comorbidities            | Cardiovascular Disease | 1        | 2.6  |
|                          | Hypertension           | 7        | 18.4 |
|                          | Diabetes               | 2        | 5.3  |
|                          | Arthritis              | 7        | 18.4 |
|                          | Cancer                 | 1        | 2.6  |
|                          | Depression             | 10       | 26.3 |
|                          | Anxiety                | 13       | 34.2 |
|                          | Asthma                 | 8        | 21.1 |
|                          | Other                  | 10       | 26.3 |
| Education                | Grade 12               | 12       | 31.6 |
|                          | GED/certificate        | 4        | 10.5 |
|                          | Associate              | 1        | 2.6  |
|                          | BA                     | 15       | 39.5 |
|                          | MA                     | 6        | 15.8 |
| Living arrangements      | Alone                  | 8        | 21.1 |
|                          | With family            | 23       | 60.5 |
|                          | With friends           | 6        | 15.8 |
|                          | Group home             | 1        | 2.6  |
| Employment               | Full time              | 8        | 21   |
|                          | Part time              | 8        | 21   |
|                          | Unemployed             | 22       | 58.0 |
| Student status           | Full time              | 7        | 18.4 |
|                          | Part time              | 2        | 5.3  |
| Community transportation | Drive independently    | 24       | 63.2 |
|                          | Driven by someone else | 24       | 63.2 |
|                          | Bus                    | 17       | 44.7 |
|                          | Taxi                   | 4        | 10.5 |
|                          | Wheelchair             | 6        | 15.8 |
|                          | Walk                   | 18       | 47.4 |
| Mobility aid             | Walking aid            | 13       | 34.2 |
|                          | Wheelchair             | 8        | 21.1 |
